# Supplementary material for: Potential hominin affinities of Graecopithecus from the Late Miocene of Europe
Source: PLoS One. 2017 May 22;12(5):e0177127. doi: 10.1371/journal.pone.0177127 (PMC5439669; doi:10.1371/journal.pone.0177127)
Supplement: S2 Table — The arcade width at each tooth position was measured at the lingual sides of the dental cervices (lingual distances between the left and right tooth row). The measuring position along the tooth row is given as distance from mid-m3 (average of both sides). All values in mm. (XLSX) [file pone.0177127.s005.xlsx]

## Sheet: Tabelle1
S2 Table. Arcade width in the types of G. freybergi and O. macedoniensis.
	Graecopithecus freybergi (holotype)		Ouranopithecus macedoniensis (cast of RPL-54; ♀)
tooth position	distance from m3 along the tooth row	arcade width	distance from m3 along the tooth row	arcade width
m3	0	26	-	-
m2	14.2	23	14.2	35.8
m1	24.7	21.5	28.4	32
p4	32.5	20	42.6	28.2
p3	38.7	15	52.2	25.6
c	-	-	60	19.5
i2	-	-	64.2	11.7
i1	-	-	67	2.2
The arcade width at each tooth position was measured at the lingual sides of the dental cervices (lingual distances between the left and right tooth row). The measuring position along the tooth row is given as distance from mid-m3 (average of both sides). All values in mm.
